# Supplementary material
Source: publisher figshare collection journal article supplement (https://acs.figshare.com/ndownloader/files/4404331)
Supplement: Supplementary file 1 [file 4404331]

## Supporting Information for

# Chemical Vapor Deposition (CVD) of Three Amino Silanes on Silicon Dioxide: Surface Characterization, Stability, Effects of Silane Concentration, and Cyanine Dye Adsorption

Feng Zhang,<sup>1</sup> Ken Sautter,<sup>2</sup> Adam M. Larsen,<sup>1</sup> Daniel A. Findley,<sup>1</sup> Robert C. Davis,<sup>3</sup>  
Hussein Samha,<sup>4,\*</sup> Matthew R. Linford<sup>1,\*</sup>

<sup>1</sup>Department of Chemistry and Biochemistry, Brigham Young University, Provo, UT 84602; <sup>2</sup>Yield Engineering Systems, Livermore, CA 94551; <sup>3</sup>Department of Physics and Astronomy, Brigham Young University, Provo, UT 84602; <sup>4</sup>Department of Physical Science, Southern Utah University, Cedar City, UT 84720.

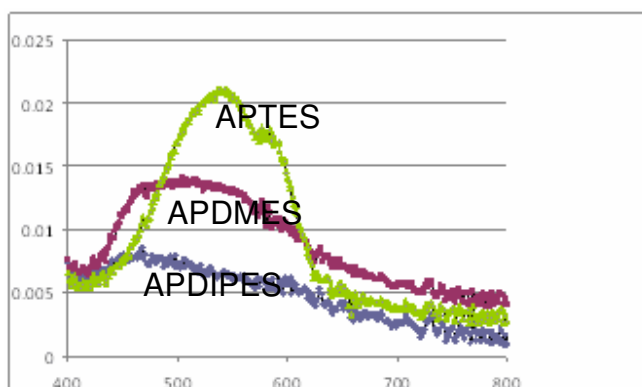

Supporting Information Figure 1. UV-VIS measurements showing dye adsorption onto aminosilane surfaces – these data were collected under the same conditions as in Figure 3 of the paper.

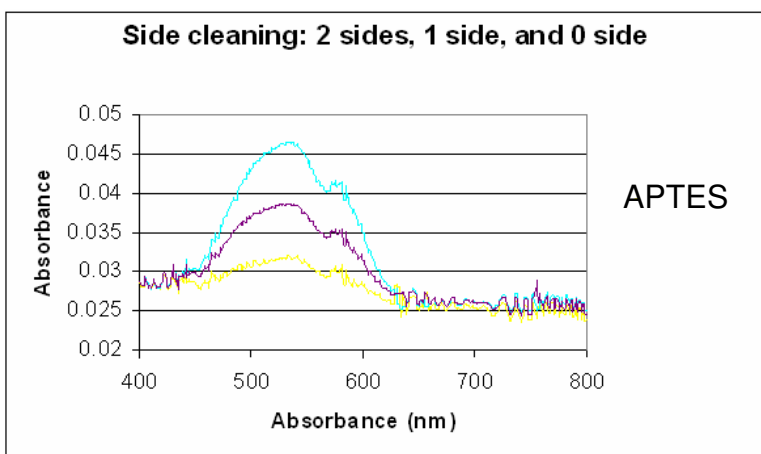

Supporting Information Figure 2. The top curve (blue) shows the absorbance of an APTES-coated glass slide after immersion in the cyanine dye solution. The middle curve shows the absorbance of the slide after one side was wiped and rubbed with a wet tissue. The bottom curve shows the absorbance after both sides of the glass slide were rubbed with the wet tissue. We conclude that both sides of the glass slides were coated during silane deposition. (The glass slides were lying on the surface of one of the plates in the YES 1224P. There was some question as to whether the silane would only deposit on the upper surface of the slide, or on both sides.)
